# Supplementary material
Source: publisher site journal article supplement (https://static.cambridge.org/content/id/urn:cambridge.org:id:article:S0007114519002757/resource/name/S0007114519002757supp001.docx)
Supplement: Supplementary file 1 [file S0007114519002757supp001.docx]

**Supplementary Figure 1.** Effects of ageing on *LEPROT* gene methylation levels in MFP samples of MMTV-TGF-α breast cancer mouse model in AL (A), CCR (B), ICR-F (C), and ICR-R (D) groups. “n value” represents samples taken from different animals. n = 3-4. AL: Ad-libitum, CCR: Chronic Calorie Restriction; ICR-RF: ICR-Refed, ICR-R: ICR-Restricted.
